# Supplementary material
Source: PubMed Central journal article supplement (PMC9179003)
Supplement: NIHMS1790992-supplement-1.pdf [file NIHMS1790992-supplement-1.pdf]

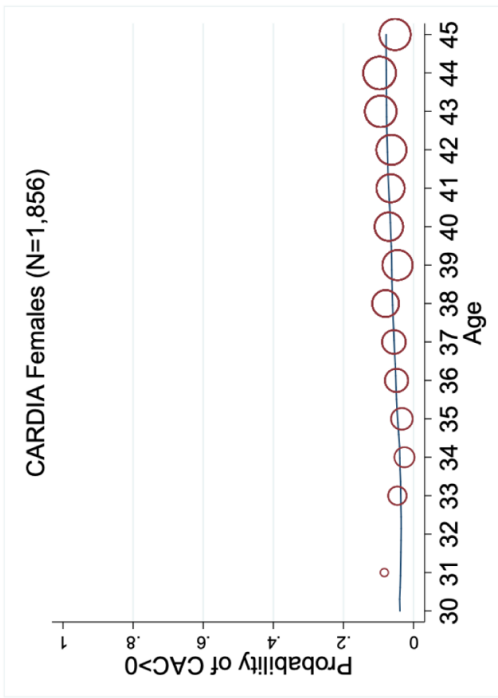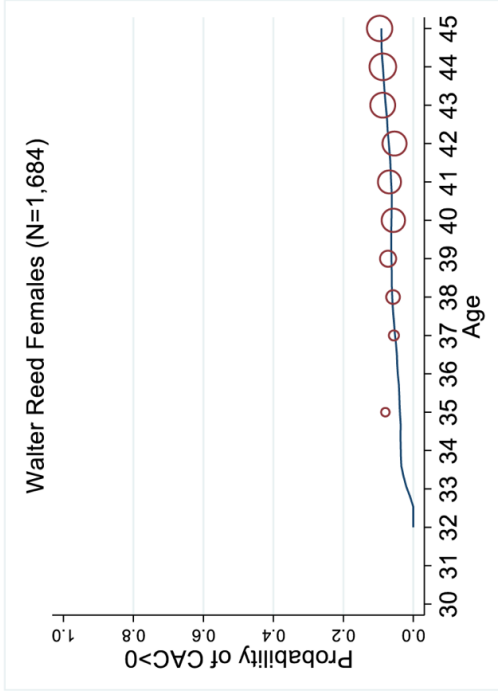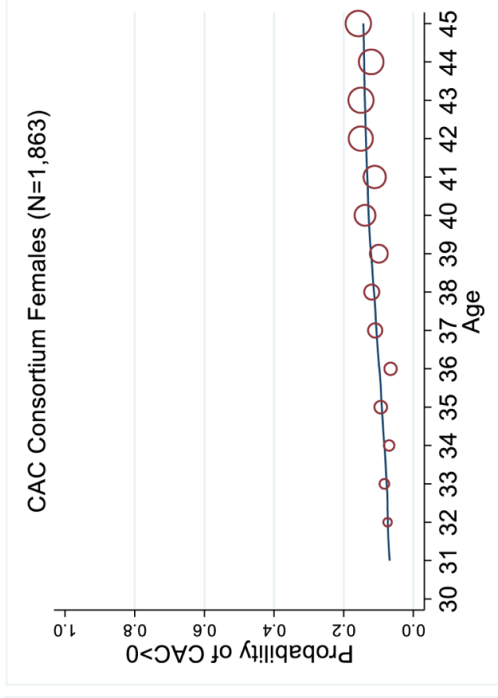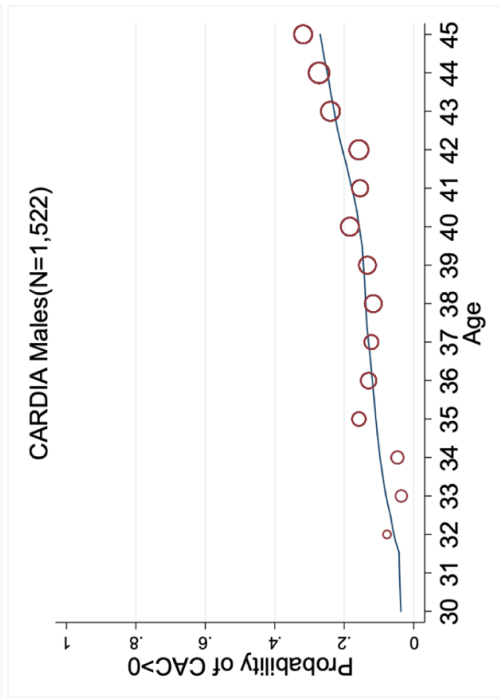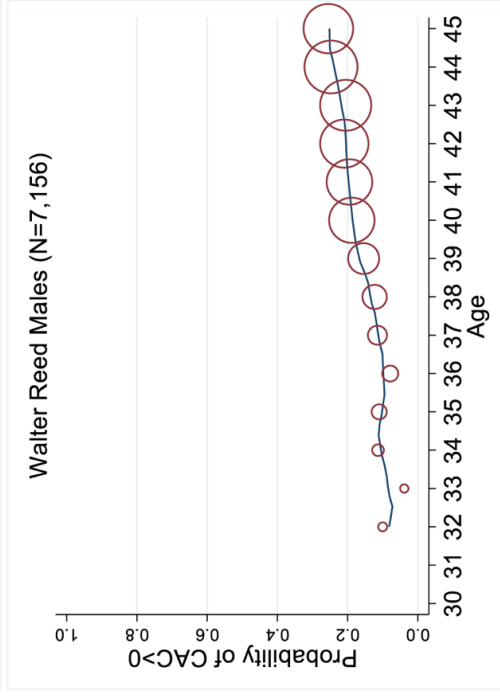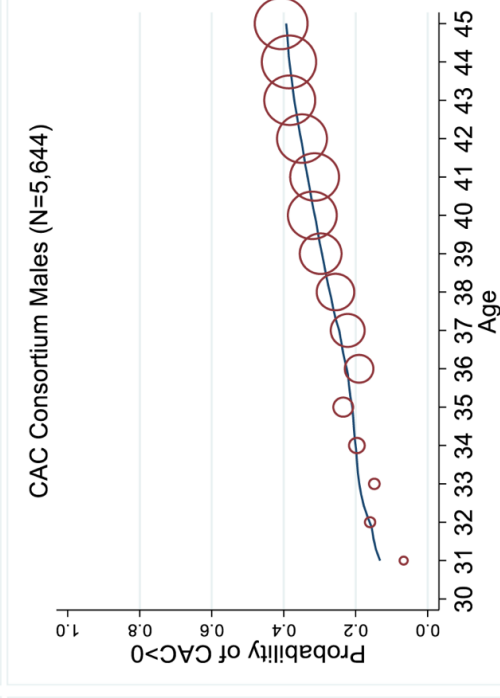

**Supplemental Figure 1. Estimated and observed weighted probability of detectable CAC by dataset.** CARDIA (left), the Walter Reed Cohort (middle), and the CAC Consortium (right) for females (top) and males (bottom). Solid line represents a local regression smoother applied to the raw data. Individual points reflect the observed age-specific probability with larger point size indicating more subjects at that age within each individual graph. CARDIA = Coronary Artery Risk Development in Young Adults, CAC = Coronary Artery Calcium.
